# Supplementary material for: Modulation of Inflammatory Mediators by Polymeric Nanoparticles Loaded with Anti-Inflammatory Drugs
Source: PubMed Central journal article supplement (PMC7926915; doi:10.3390/pharmaceutics13020290), 2021-02-23
Supplement: pharmaceutics-13-00290-s001.pdf [file pharmaceutics-13-00290-s001.pdf]

# Supplementary Material: Modulation of Inflammatory Mediators by Polymeric Nanoparticles Loaded with Anti-Inflammatory Drugs

Gloria María Pontes-Quero, Lorena Benito-Garzón, Juan Pérez Cano, María Rosa Aguilar and Blanca Vázquez-Lasa

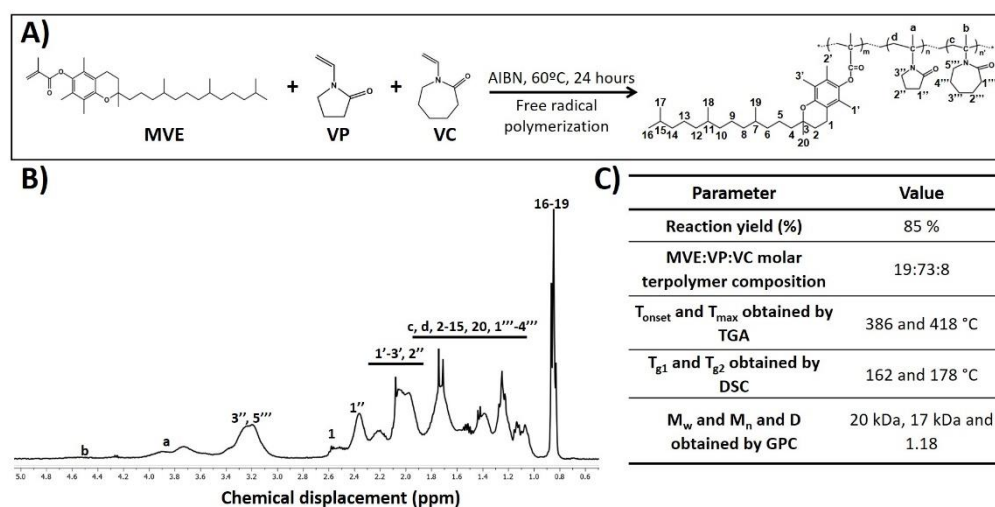

**Figure S1.** (A) Scheme of terpolymer poly(MVE-co-VP-co-VC) synthesis. (B) Terpolymer <sup>1</sup>H-NMR spectrum (400 MHz) in CDCl<sub>3</sub>. (C) <sup>1</sup>H-NMR, TGA, DSC and GPC characterization of the terpolymer. T<sub>onset</sub>, temperature at the onset of the major decay; T<sub>max</sub>, maximum thermal degradation rate temperature; T<sub>g</sub>, glass transition temperature; M<sub>w</sub>, weight average molecular weight; M<sub>n</sub>, number average molecular weight, Đ, polydispersity index.

**Citation:** Pontes-Quero, G.M.; Benito-Garzón, L.; Pérez Cano, J.; Aguilar, M.R.; Vázquez-Lasa, B. Modulation of Inflammatory Mediators by Polymeric Nanoparticles Loaded with Anti-Inflammatory Drugs. *2021*, *13*

**Publisher's Note:** MDPI stays neutral with regard to jurisdictional claims in published maps and institutional affiliations.

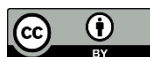

**Copyright:** © 2021 by the authors. Submitted for possible open access publication under the terms and conditions of the Creative Commons Attribution (CC BY) license (<http://creativecommons.org/licenses/by/4.0/>).

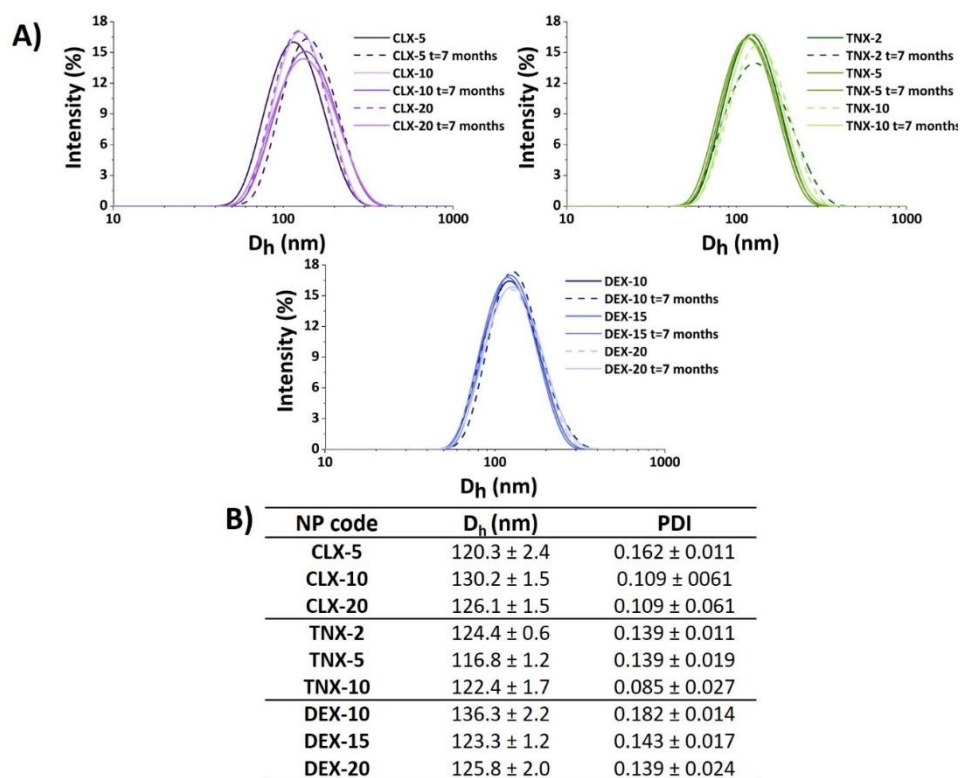

**Figure S2.** NP stability in terms of aggregation. **(A)** NP size distribution assessment by dynamic light scattering immediately after synthesis and after 7 months of static storage at 4 °C. **(B)** Hydrodynamic diameter ( $D_h$ ) and polydispersity index (PDI) of loaded NPs after 7 months of static storage at 4 °C.

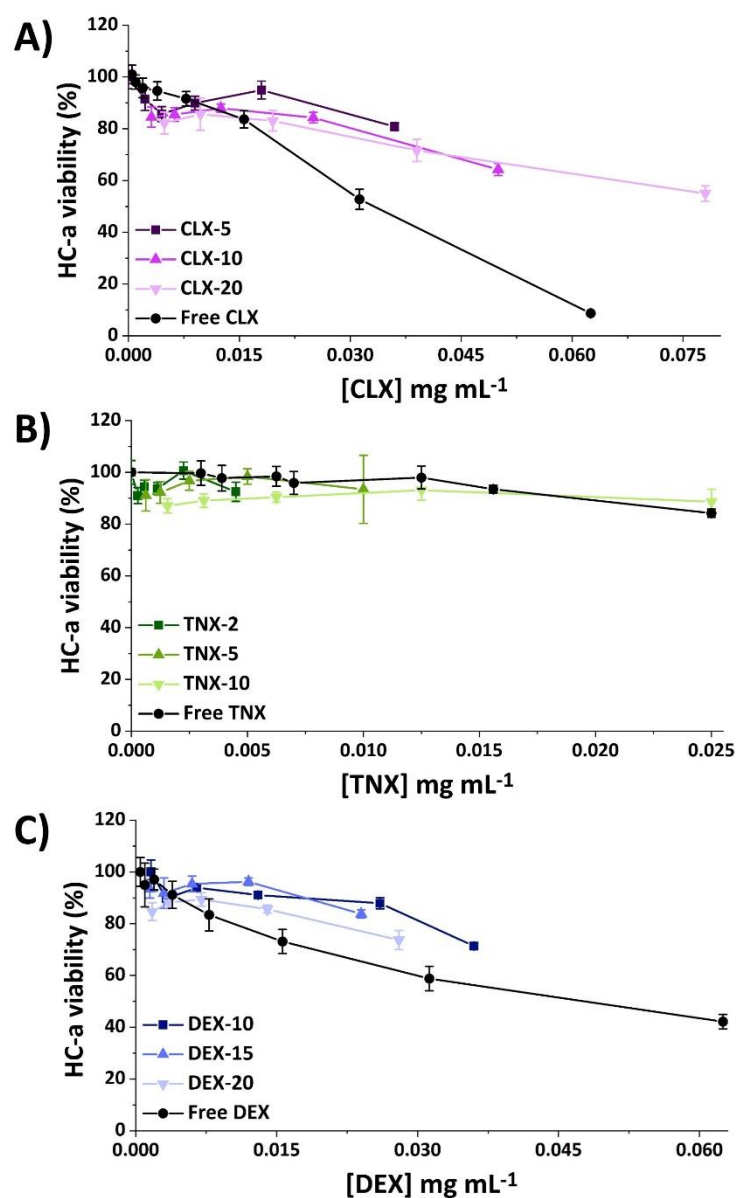

**Figure S3.** Representation of HC-a viabilities after 24 h of exposure to the NPs or to the corresponding free drug against the encapsulated concentrations of (A) CLX, (B) TNX and (C) DEX.

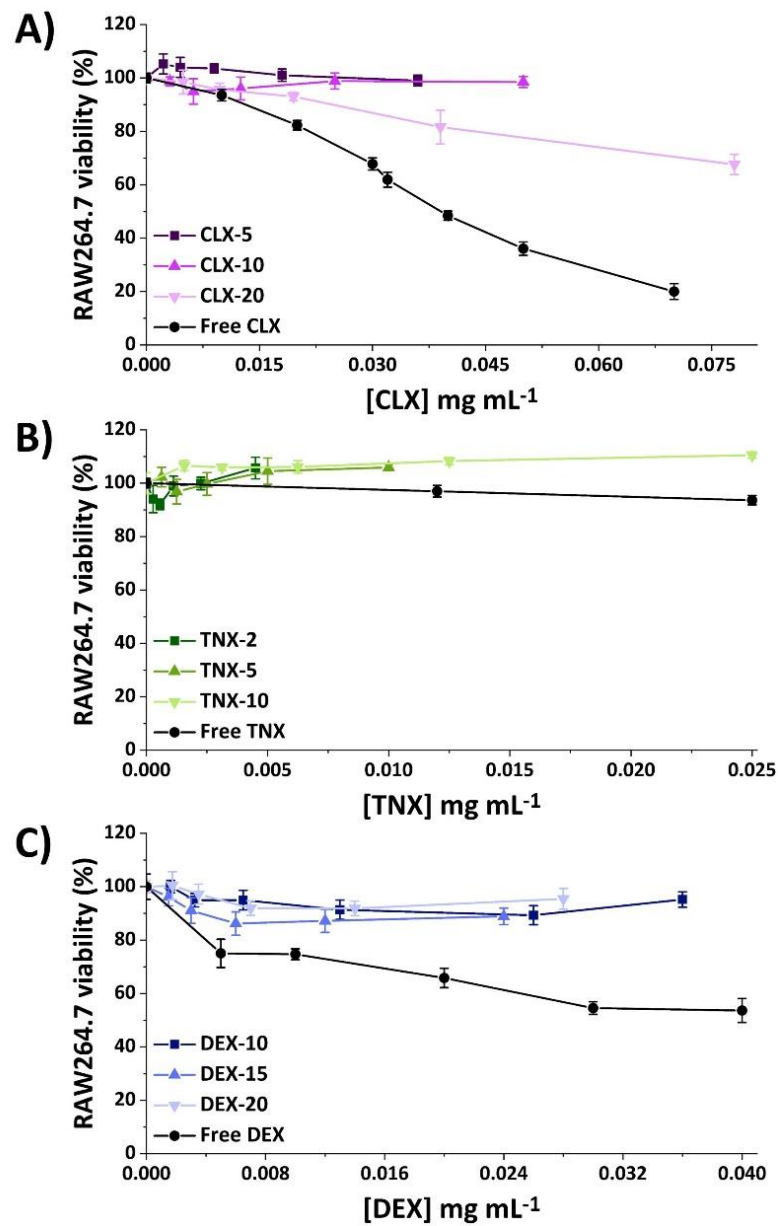

Figure S4. Representation of RAW264.7 viabilities after 24 h of exposure to the NPs or to the corresponding free drug against the encapsulated concentrations of A) CLX, B) TNX and C) DEX.

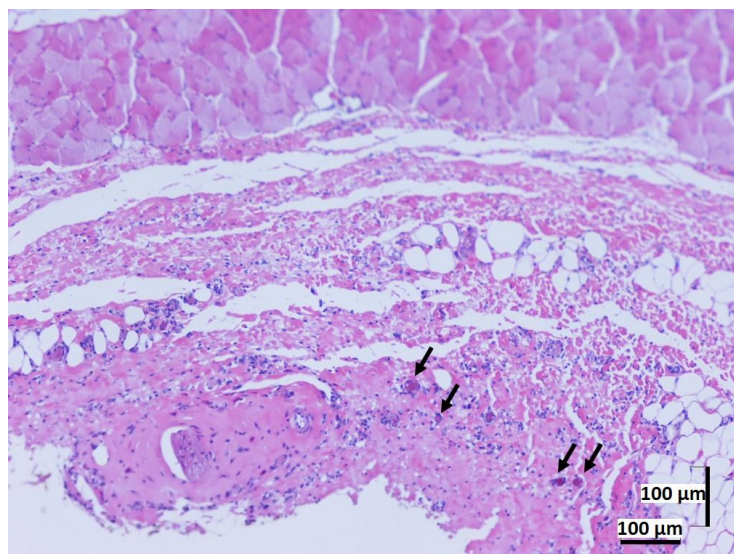

**Figure S5.** Representative image of tissue section of rats treated with CLX-10 NPs 1 week after injection. A small inflammatory reaction was appreciated mainly based on macrophage infiltration at the subcutaneous tissue. Small vessels are highlighted with arrows. (H-E, scale bar: 100  $\mu\text{m}$ ).

**Table S1.** Inflammatory factors studied in the mouse inflammation antibody array.

| Inflammatory factors under study                                                                                                                                                                                                                                                                                                                                                    |
|-------------------------------------------------------------------------------------------------------------------------------------------------------------------------------------------------------------------------------------------------------------------------------------------------------------------------------------------------------------------------------------|
| BLC, CD30L, Eotaxin, Eotaxin-2, Fas Ligand, Fractalkine, GCSF, GM-CSF, IFN- $\gamma$ , IL-1 $\alpha$ , IL-1 $\beta$ , IL-2, IL-3, IL-4, IL-6, IL-9, IL-10, IL-12 p40/p70, IL-12 p70, IL-13, IL-17, I-TAC, KC/CXCL1, Leptin/OB, LIX, Lymphotoctin, MCP-1, MCSF, MIG, MIP-1 $\alpha$ , MIP-1 $\gamma$ , RANTES, SDF-1, TCA-3, TECK, TIMP-1, TIMP-2, TNF- $\alpha$ , sTNF RI, sTNF-RII |
